# Supplementary material for: The Xanthomonas RaxH-RaxR Two-Component Regulatory System Is Orthologous to the Zinc-Responsive Pseudomonas ColS-ColR System
Source: MDPI journal article supplement (doi:10.3390/microorganisms9071458), 2021-07-07
Supplement: s1 [file s1]

## Supplementary Information

The *Xanthomonas* RaxH-RaxR two-component regulatory system is orthologous to the zinc-responsive *Pseudomonas* ColS-ColR system

**Valley Stewart<sup>1</sup> and Pamela C. Ronald<sup>2</sup>**

<sup>1</sup>Department of Microbiology & Molecular Genetics

<sup>2</sup>Department of Plant Pathology and Genome Center  
University of California, Davis

vjstewart@ucdavis.edu | pcronald@ucdavis.edu

---

**Figure S1** (following page). Periplasmic domains from select RaxH and ColS sequences. Highlighted residues are: Glu in ExxE motifs (yellow); invariant in all sequences (black); invariant in all RaxH sequences (green); invariant in all ColS sequences (blue); approximate transmembrane segment boundaries (light gray).

### Abbreviations:

|     |                                                                   |     |                                                         |
|-----|-------------------------------------------------------------------|-----|---------------------------------------------------------|
| Xoo | <i>Xanthomonas oryzae</i> pv. <i>oryzae</i><br>PXO99 <sup>A</sup> | Rte | <i>Rehaibacterium terrae</i> DSM 25897                  |
| Sma | <i>Stenotrophomonas maltophilia</i> K279a                         | Tca | <i>Thermomonas carbonis</i> KCTC 42013                  |
| Aco | <i>Arenimonas composti</i> DSM 18010                              | Cfl | <i>Chiayiivirga flava</i> DSM 2416                      |
| Lgr | <i>Luteimonas granuli</i> Gr-4                                    | Dko | <i>Dokdonella koreensis</i> DS-123                      |
| Lyi | <i>Luteimonas yindakuii</i> S-1072                                | Pae | <i>Pseudomonas aeruginosa</i> PAO1                      |
| Len | <i>Lysobacter enzymogenes</i> YC36                                | Ppu | <i>Pseudomonas putida</i> KT2440                        |
| Lgu | <i>Lysobacter gummosus</i> 3.2.11                                 | Pfl | <i>Pseudomonas fluorescens</i> A506                     |
| Psp | <i>Pseudoxanthomonas spadix</i> BD-a59                            | Psy | <i>Pseudomonas syringae</i> pv. <i>tomato</i><br>DC3000 |
| Psu | <i>Pseudoxanthomonas suwonensis</i> 11-1                          | Pst | <i>Pseudomonas stutzeri</i> A1501                       |

Figure S1. Legend on previous page.

|                      |                                             |                                          |     |
|----------------------|---------------------------------------------|------------------------------------------|-----|
| Xoo                  | MSKQRPLGLRVLVWLMFGYTLMLTLAVFGTAQYLHERA      | EHGVRSLSLNSELDSTLERSVQNPDPYHWQSDSDLRLY   | 74  |
| Sma                  | MKASKPGPLYRRVWMLLGYLALLSIAVFSVGNVYV         | EHAEHAAMRALLNSELDSIVEHTEHEPHYRWQSDSDLRLY | 76  |
| Aco                  | MSARPASLRRRTIVLWLAFTALTVAVIAQGAFW           | EYERSVRSLLTVELDHFLERRRTDPAFRWDGTAGIAVY   | 75  |
| Lgr                  | MRTRPSLRRRLMQALTAYALLSLVVLVHGTLN            | ERAEALVWESLTAEFELLERRSEEPGYGWHDDTLVLF    | 74  |
| Lyj                  | MRTRPSLTRQITLGLVYGVLLSVLAFVHGLL             | EQAERMVQAMLETSMDLLERRRHPDFGWRNNGRLDLH    | 74  |
| Len                  | MATPDRPAAPRPSLRQILLGLFGYTALLSIAWVQGV        | ENAEHLVWTSMDTELDFEVERSRIDADYRWTDTALSLY   | 84  |
| Lgu                  | MATPAESPDKSKPKGRKTRSLRQILLGLFGYTALLSIAWVQGV | ENAEHLVWTSMDTELDFEVERSRIDADYRWTDTALSLY   | 89  |
| Psp                  | MSLPMAIRISLRKRLRWALVYLVWVTGAWLGGEV          | ENAEHQVRSLSMRSDLQHFEVRRQADPGYNWIDPAERLY  | 78  |
| Psu                  | MKPGGIRSLRGLRARITLWLVYALISLAVFIHGFI         | VEAEQLTWSRLKSELAHFVQSAEDPHYHWTDTETVQLY   | 80  |
| Rte                  | MNRRTLRARITGLLGYALMAAAIFLHGYIV              | EAVERTVRSLLLELDFYQTRRAADPRFEWPQETETALY   | 73  |
| Tca                  | MPLRQPHSLHRTIVLWLAFTALTVAVIAQGTAVI          | EYERTVRSMLMAELDHFYQTRRAADPRFEWPQETETALY  | 76  |
| Cfl                  | MIRSTLSRIAASLFFVSLVAAVLSLGYLV               | EDVEAVIWAAVLEPAMERHLAAEGRLETPRVSGRIGTFSV | 73  |
| Dko                  | MKPRWGLRRITVGLIAYAVLSIAVAVHGFV              | ENAEHLVWESLHAEMDHLNRRATDPDYRWPDTQLELL    | 74  |
| Pae                  | MEYKQSLARRIVIAFMLMTAVGGLFSAGIVGWHII         | EEERLISRD LGGELERL RDDLAQGRNPVLDPGMRFFI  | 74  |
| Ppu                  | MEFKQSLAQRILIAFALMSALVAGAFAGIVGTVHLV        | EEERLISV LGGDLQRLL RMDSVSDWSHRPRPDQLFYF  | 74  |
| Pfl                  | MEFKQSLAQRILIAFALMSALVAGAFAMIVATVHLV        | EEKLSAGLGGDLQRLL RMDSVSDWSHRPRPDQLFYF    | 74  |
| Psy                  | MEFKQSLAQRILIAFALMSALVAGSFAIGIISTVHLV       | EEKLSAGLGGDLNRMLMDSVSDWSHRPRPDQLFYF      | 74  |
| Pst                  | MLAKQPFARIVIAFTLMTLVSGVFSLGIVAVYF           | ESQLVTGELSREL DIVLHEDLPSGRPPRLDAQTRFFS   | 74  |
| Transmembrane 1 Exxe |                                             |                                          |     |
| Xoo                  | HIDDV----                                   | ARAPPVRLTLP                              | 159 |
| Sma                  | RFDE----                                    | GMPESVRLHPGLH                            | 160 |
| Aco                  | RGDA----                                    | PALPELSGLAPGLH                           | 158 |
| Lgr                  | GDA----                                     | RPLPPEVVALPGGLH                          | 156 |
| Lyj                  | ILDAAD----                                  | ARTPDALRPLAPGLH                          | 159 |
| Len                  | DSAT----                                    | RPPPRELAALAPGVH                          | 167 |
| Lgu                  | DDAT----                                    | RPPPELRLSPGLH                            | 172 |
| Psp                  | FLNTD----                                   | PDVPTKLAALKPGGLH                         | 162 |
| Psu                  | GDDDD----                                   | SPAPPEFARFGPGGLH                         | 164 |
| Rte                  | RRPLSETASHLPLALER                           | PLALERPLGLH                              | 161 |
| Tca                  | VGADD----                                   | PDLPELRLGLKPGGLH                         | 160 |
| Cfl                  | RTAAPWP--                                   | TDVPGDLRTLPEGLH                          | 159 |
| Dko                  | TFPAG----                                   | STIPPLDLTLEPGVH                          | 158 |
| Pae                  | SDGQGS---                                   | YAMPALDQLDVGFH                           | 158 |
| Ppu                  | SGGRDD---                                   | FELPKDLRHLDRGFH                          | 158 |
| Pfl                  | SGPGD---                                    | FELPKDLRHLERGFH                          | 158 |
| Psy                  | SNPGPD---                                   | FDLPKDLRHLERGFH                          | 158 |
| Pst                  | TALPD----                                   | YPLPEGFATLPEGFT                          | 157 |
| Transmembrane 2 Exxe |                                             |                                          |     |
| Xoo                  | HIDDV----                                   | ARAPPVRLTLP                              | 159 |
| Sma                  | RFDE----                                    | GMPESVRLHPGLH                            | 160 |
| Aco                  | RGDA----                                    | PALPELSGLAPGLH                           | 158 |
| Lgr                  | GDA----                                     | RPLPPEVVALPGGLH                          | 156 |
| Lyj                  | ILDAAD----                                  | ARTPDALRPLAPGLH                          | 159 |
| Len                  | DSAT----                                    | RPPPRELAALAPGVH                          | 167 |
| Lgu                  | DDAT----                                    | RPPPELRLSPGLH                            | 172 |
| Psp                  | FLNTD----                                   | PDVPTKLAALKPGGLH                         | 162 |
| Psu                  | GDDDD----                                   | SPAPPEFARFGPGGLH                         | 164 |
| Rte                  | RRPLSETASHLPLALER                           | PLALERPLGLH                              | 161 |
| Tca                  | VGADD----                                   | PDLPELRLGLKPGGLH                         | 160 |
| Cfl                  | RTAAPWP--                                   | TDVPGDLRTLPEGLH                          | 159 |
| Dko                  | TFPAG----                                   | STIPPLDLTLEPGVH                          | 158 |
| Pae                  | SDGQGS---                                   | YAMPALDQLDVGFH                           | 158 |
| Ppu                  | SGGRDD---                                   | FELPKDLRHLDRGFH                          | 158 |
| Pfl                  | SGPGD---                                    | FELPKDLRHLERGFH                          | 158 |
| Psy                  | SNPGPD---                                   | FDLPKDLRHLERGFH                          | 158 |
| Pst                  | TALPD----                                   | YPLPEGFATLPEGFT                          | 157 |

**Figure S2** (following page). *raxRH* gene neighborhoods in members of the order *Lysobacterales* (formerly *Xanthomonadales*). Non-contiguous genes are on separate lines. Genes are color-coded: *raxR* (dark blue); *raxH* (light blue;); *eptA*, phosphoethanolamine transferase (dark red); *lpxE*, lipid A 1-phosphatase (red); *arnT*, sugar-undecaprenyl phosphate transferase (orange); predicted undecaprenyl phosphate-sugar transferase, and amino-terminal domain in the *Chlamydia* LpxB lipid A-disaccharide synthase (green); predicted sugar nucleotide epimerase (light green); *mdoB*, phosphoglycerol transferase (dark gray); predicted methyltransferase (light gray); LPS heptose kinase (white); and insertion sequence (black rectangle).

**Figure S2.** Legend on previous page.

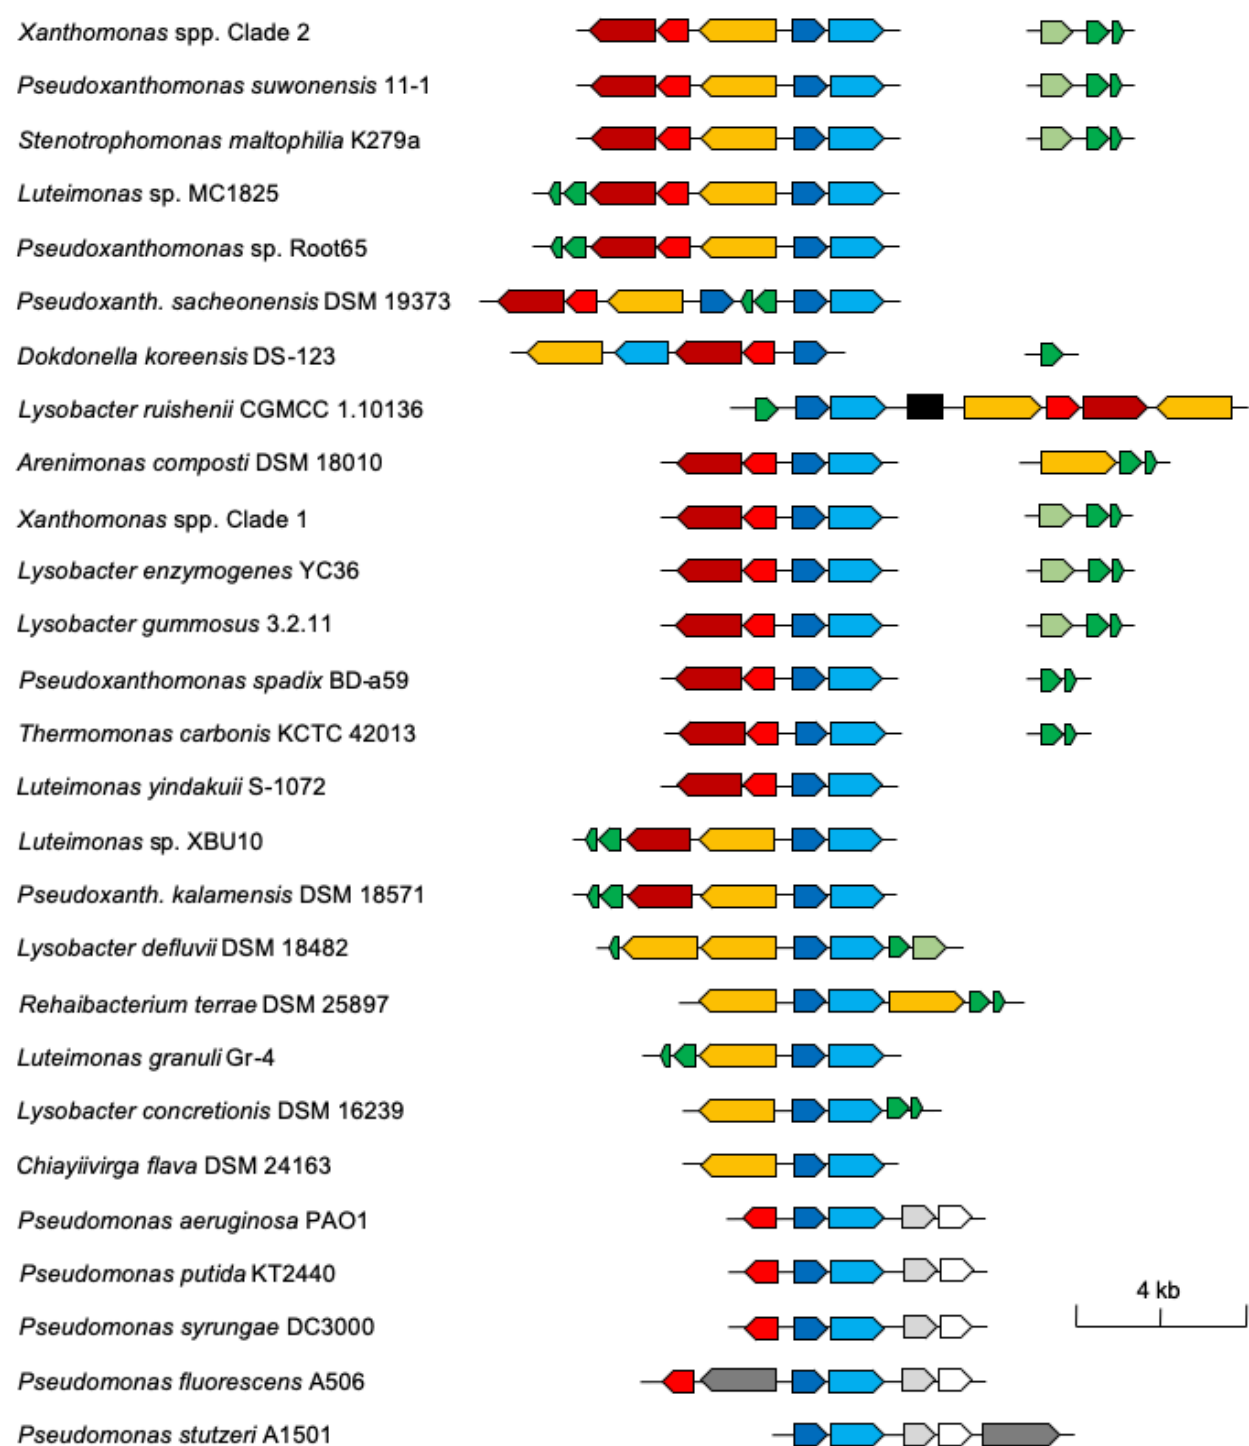

**Figure S3.** Percent G+C across the *gcvP*-*minCDE* region in *Xoo* PXO99<sup>A</sup>. The plot was constructed in MegAlign. The red line shows the median G+C value for the PXO99<sup>A</sup> genome.

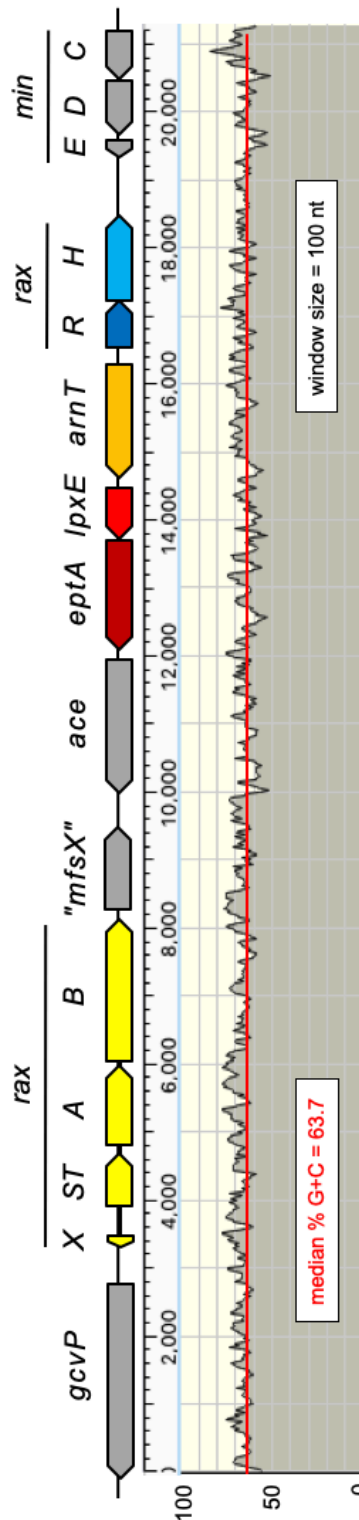

**Table S1.** Locus tags and accession numbers.

| Symbol | Strain <sup>a</sup> | Locus Tag   | Accession      | Length |
|--------|---------------------|-------------|----------------|--------|
| ColR   | <i>Pae</i>          | PA4381      | WP_003094039.1 | 227    |
| DetR   | <i>Xoo</i>          | PXORS_05125 | WP_002811889.1 | 237    |
| RaxR   | <i>Xoo</i>          | PXORS_06050 | WP_011409239.1 | 238    |
| VgrR   | <i>Xoo</i>          | PXORS_18925 | WP_011407833.1 | 225    |
| ColS   | <i>Pae</i>          | PA4380      | WP_003094037.1 | 426    |
| ColS   | <i>Ppu</i>          | PP_0902     | AAN66527.2     | 436    |
| ColS   | <i>Pfl</i>          | PSEBR_a4371 | CAA70932.1     | 425    |
| ColS   | <i>Pst</i>          | PST_0914    | WP_011912104   | 422    |
| ColS   | <i>Psy</i>          | PSPTO_4373  | WP_003380966   | 429    |
| DetS   | <i>Xoo</i>          | PXORS_05130 | WP_027704202.1 | 423    |
| RaxH   | <i>Xoo</i>          | PXORS_06055 | WP_027703305.1 | 430    |
| VgrS   | <i>Xoo</i>          | PXORS_18935 | WP_027704076.1 | 439    |
| EptA   | <i>Xoo</i>          | PXO_RS06035 | WP_041182603.1 | 556    |
| EptA   | <i>Pae</i>          | PA1972      | WP_003113468.1 | 567    |
| EptA   | <i>Nmb</i>          | NMB1638     | WP_002216735.1 | 544    |
| LpxE   | <i>Xoo</i>          | PXO_RS06040 | WP_011409241.1 | 254    |
| LpxE   | <i>Pae</i>          | PA4382      | WP_003112760.1 | 264    |
| LpxE   | <i>Ret</i>          | —           | WP_011654039.1 | 244    |
| ArnT   | <i>Xoo</i>          | PXO_RS06045 | WP_027703306.1 | 577    |
| ArnT   | <i>Pae</i>          | PA3556      | WP_038403631.1 | 549    |
| ArnT   | <i>Cme</i>          | Rmet_4828   | ABF11690       | 575    |
| —      | <i>Xoo</i>          | PXO_RS2226  | WP_011407452.1 | 240    |
| ArnC   | <i>Pae</i>          | PA3553      | WP_003112880.1 | 339    |
| —      | <i>Xoo</i>          | PXO_RS14680 | WP_011408225.1 | 348    |
| FlmF1  | <i>Fno</i>          | FTN_1403    | ABK90273.1     | 314    |
| FlmF2  | <i>Fno</i>          | FTN_0545    | ABK89440.1     | 318    |

<sup>a</sup> *Cme*, *Cupriavidus metallidurans* CH34; *Fno*, *Francisella novicida* U112; *Nmb*, *Neisseria meningitidis* MC58; *Ret*, *Rhizobium etli* (*leguminosarum*) CFN42; *Pae*, *Pseudomonas aeruginosa* PAO1; *Pfl*, *Pseudomonas fluorescens* WCS365; *Ppu*, *Pseudomonas putida* KT240; *Psy*, *Pseudomonas syringae* pv. *tomato* DC3000; *Pst*, *Pseudomonas stutzeri* A1501; *Xoo*, *Xanthomonas oryzae* pv. *oryzae* PXO99<sup>A</sup>

**Table S2.** Genome sequences used for gene neighborhood analysis.

| Species                                                   | Strain        | Accession            |
|-----------------------------------------------------------|---------------|----------------------|
| <b>Order Lysobacterales (formerly Xanthomonadales)</b>    |               |                      |
| <b>Family Rhodanobacteraceae</b>                          |               |                      |
| <i>Chiayiivirga flava</i>                                 | DSM 24163     | NZ_JACHHP000000000.1 |
| <i>Dokdonella koreensis</i>                               | DS-123        | NZ_CP015249.1        |
| <b>Family Lysobacteraceae (formerly Xanthomonadaceae)</b> |               |                      |
| <i>Arenimonas composti</i>                                | DSM 18010     | NZ_AUFF000000000.1   |
| <i>Luteimonas granuli</i>                                 | Gr-4          | NZ_CP042218.1        |
| <i>Luteimonas yindakuii</i>                               | S-1072        | NZ_CP039383.2        |
| <i>Luteimonas</i> sp.                                     | MC1825        | NZ_CP061714.1        |
| <i>Luteimonas</i> sp.                                     | XBU10         | NZ_VTFT000000000.1   |
| <i>Lysobacter concretionis</i>                            | DSM 16239     | NZ_AVPS000000000.1   |
| <i>Lysobacter defluvii</i>                                | DSM 18482     | NZ_AUHT000000000.1   |
| <i>Lysobacter enzymogenes</i>                             | YC36          | NZ_CP040656.1        |
| <i>Lysobacter gummosus</i>                                | 3.2.11        | NZ_CP011131.1        |
| <i>Lysobacter ruishenii</i>                               | CGMCC 1.10136 | NZ_VLKP000000000.1   |
| <i>Pseudoxanthomonas kalamensis</i>                       | DSM 18571     | NZ_PDWQ000000000.1   |
| <i>Pseudoxanthomonas sacheonensis</i>                     | DSM 19373     | NZ_PDWS000000000.1   |
| <i>Pseudoxanthomonas spadix</i>                           | BD-a59        | NC_016147.2          |
| <i>Pseudoxanthomonas suwonensis</i>                       | 11-1          | NC_014924.1          |
| <i>Pseudoxanthomonas</i> sp.                              | Root65        | NZ_LMHA000000000.1   |
| <i>Rehaibacterium terrae</i>                              | DSM 25897     | NZ_JACHHX000000000.1 |
| <i>Stenotrophomonas maltophilia</i>                       | K279a         | NC_010943.1          |
| <i>Thermomonas carbonis</i>                               | KCTC 42013    | NZ_BMZL000000000.1   |
| <b>Clade 1 Xanthomonas spp. with raxX-raxSTAB</b>         |               |                      |
| <i>Xanthomonas translucens</i> pv. <i>cerealis</i>        | CFBP 2541     | NZ_CM003052.1        |
| <i>Xanthomonas translucens</i> pv. <i>translucens</i>     | DSM 18974     | NZ_CAPJ000000000.1   |
| <i>Xanthomonas translucens</i> pv. <i>undulosa</i>        | ICMP 11055    | NZ_CP009750.1        |
| <b>Clade 1 Xanthomonas spp. without raxX-raxSTAB</b>      |               |                      |
| <i>Xanthomonas albilineans</i>                            | GPE PC73      | NC_013722.1          |
| <i>Xanthomonas hyacinthi</i>                              | DSM 19077     | JPLD000000000.1      |
| <i>Xanthomonas sacchari</i>                               | R1            | NZ_CP010409.1        |
| <i>Xanthomonas theicola</i>                               | CFBP 4691     | NZ_CP049017.1        |
| <b>Clade 2 Xanthomonas spp. with raxX-raxSTAB</b>         |               |                      |
| <i>Xanthomonas alfalfae</i>                               | GEV-Rose-07   | MIKD000000000.1      |
| <i>Xanthomonas axonopodis</i> pv. <i>manihotis</i>        | UA536         | AKEQ000000000.1      |
| <i>Xanthomonas cucurbitae</i>                             | CFBP 2542     | NZ_MDED000000000.1   |
| <i>Xanthomonas dyei</i>                                   | CFBP 7245     | NZ_MDEE000000000.1   |
| <i>Xanthomonas euvesicatoria</i>                          | 85-10         | NC_007508.1          |

**Table S2** (continued). Genomes used for gene neighborhood analysis.

| Species                                                            | Strain             | Accession         |
|--------------------------------------------------------------------|--------------------|-------------------|
| <i>Xanthomonas maliensis</i> *                                     | M97                | NZ_AQPR00000000.1 |
| <i>Xanthomonas perforans</i>                                       | 91-118             | NZ_CP019725.1     |
| <i>Xanthomonas phaseoli</i> pv. <i>dieffenbachiae</i>              | LMG 695            | NZ_JPYB00000000.1 |
| <i>Xanthomonas phaseoli</i> pv. <i>phaseoli</i>                    | CFBP 412           | NZ_CP020964.2     |
| <i>Xanthomonas prunicola</i>                                       | CFBP 8353          | NZ_PHKV00000000.1 |
| <i>Xanthomonas oryzae</i> pv. <i>leersiae</i>                      | NCPPB 4346         | LHUK00000000.1    |
| <i>Xanthomonas oryzae</i> pv. <i>oryzae</i>                        | AXO1947            | NZ_CP013666.1     |
| <i>Xanthomonas oryzae</i> pv. <i>oryzae</i>                        | PXO99 <sup>A</sup> | NC_010717.2       |
| <i>Xanthomonas oryzae</i> pv. <i>oryzicola</i>                     | BLS256             | NC_017267.2       |
| <i>Xanthomonas vasicola</i> pv. <i>musacearum</i>                  | NCPPB 4392         | AKBI00000000.1    |
| <i>Xanthomonas vasicola</i> pv. <i>vasculorum</i>                  | NCPPB 206          | AKBM00000000.1    |
| <b>Clade 2 <i>Xanthomonas</i> spp. without <i>raxX-raxSTAB</i></b> |                    |                   |
| <i>Xanthomonas arboricola</i> pv. <i>juglandis</i>                 | Xaj 417            | NZ_CP012251.1     |
| <i>Xanthomonas bromi</i>                                           | CFBP 1976          | NZ_MDCE00000000.1 |
| <i>Xanthomonas campestris</i> pv. <i>campestris</i>                | 8004               | NC_007086.1       |
| <i>Xanthomonas campestris</i> pv. <i>raphani</i>                   | 756C               | NC_017271.1       |
| <i>Xanthomonas cannabidis</i> pv. <i>cannabidis</i>                | NCPPB 2877         | JSZE00000000.1    |
| <i>Xanthomonas cassavae</i>                                        | CFBP 4642          | NZ_ATMC00000000.1 |
| <i>Xanthomonas citri</i> pv. <i>citri</i>                          | 306                | NC_003919.1       |
| <i>Xanthomonas codiae</i>                                          | CFBP 4690          | NZ_MDEC00000000.1 |
| <i>Xanthomonas floridensis</i>                                     | WHRI 8848          | NZ_LXNG00000000.1 |
| <i>Xanthomonas fragariae</i>                                       | LMG 25863          | AJRZ00000000.1    |
| <i>Xanthomonas hortorum</i> pv. <i>gardneri</i>                    | ICMP 7383          | NZ_CP018731.1     |
| <i>Xanthomonas massiliensis</i>                                    | SN8                | NZ_FCOY00000000.1 |
| <i>Xanthomonas melonis</i>                                         | CFBP 4644          | NZ_MDEH00000000.1 |
| <i>Xanthomonas nasturtii</i>                                       | WHRI 8853          | NZ_LYMI00000000.1 |
| <i>Xanthomonas pisi</i>                                            | CFBP 4643          | NZ_MDEI00000000.1 |
| <i>Xanthomonas populi</i>                                          | CFBP 1817          | NZ_MDEJ00000000.1 |
| <i>Xanthomonas retroflexus</i>                                     | Sp953              | FRDD00000000.1    |
| <i>Xanthomonas vesicatoria</i>                                     | LMG 911            | NZ_CP018725.1     |
| <b>Order <i>Pseudomonadales</i></b>                                |                    |                   |
| <b>Family <i>Pseudomonadaceae</i></b>                              |                    |                   |
| <i>Pseudomonas aeruginosa</i>                                      | PAO1               | NC_002516.2       |
| <i>Pseudomonas fluorescens</i>                                     | A506               | NC_021361.1       |
| <i>Pseudomonas putida</i>                                          | KT2440             | NC_002947.4       |
| <i>Pseudomonas stutzeri</i>                                        | A1501              | NC_009434.1       |
| <i>Pseudomonas syringae</i> pv. <i>tomato</i>                      | DC3000             | AE016853.1        |

\* Intermediate between clades 1 and 2
